# Supplementary material for: Decomposition of multifunctionalized α-alkoxyalkyl-hydroperoxides derived from the reactions of Criegee intermediates with diols in liquid phases
Source: Royal Society of Chemistry journal article supplement (doi:10.1039/d2cp00915c), 2022-01-01
Supplement: d2cp00915c1.pdf [file d2cp00915c1.pdf]

Supplementary Information for  
**Decomposition of multifunctionalized  $\alpha$ -alkoxyalkyl-hydroperoxides  
derived from the reactions of Criegee intermediates with diols in liquid  
phases**

**Yasuyuki Endo<sup>a</sup>, Yosuke Sakamoto<sup>abc</sup>, Yoshizumi Kajii<sup>abc</sup> and Shinichi Enami<sup>\*c</sup>**

<sup>a</sup> *Graduate School of Global Environmental Studies, Kyoto University, Kyoto, 606-8501, Japan*

<sup>b</sup> *Graduate School of Human and Environmental Studies, Kyoto University, Kyoto, 606-8316,  
Japan*

<sup>c</sup> *National Institute for Environmental Studies, 16-2 Onogawa, Tsukuba, 305-8506, Japan*

---

\*Author to whom correspondence should be addressed: enami.shinichi@nies.go.jp, telephone:  
+81-29-850-2770

**No. of Supporting Pages: 8**

**No. of Supporting Figures: 7**

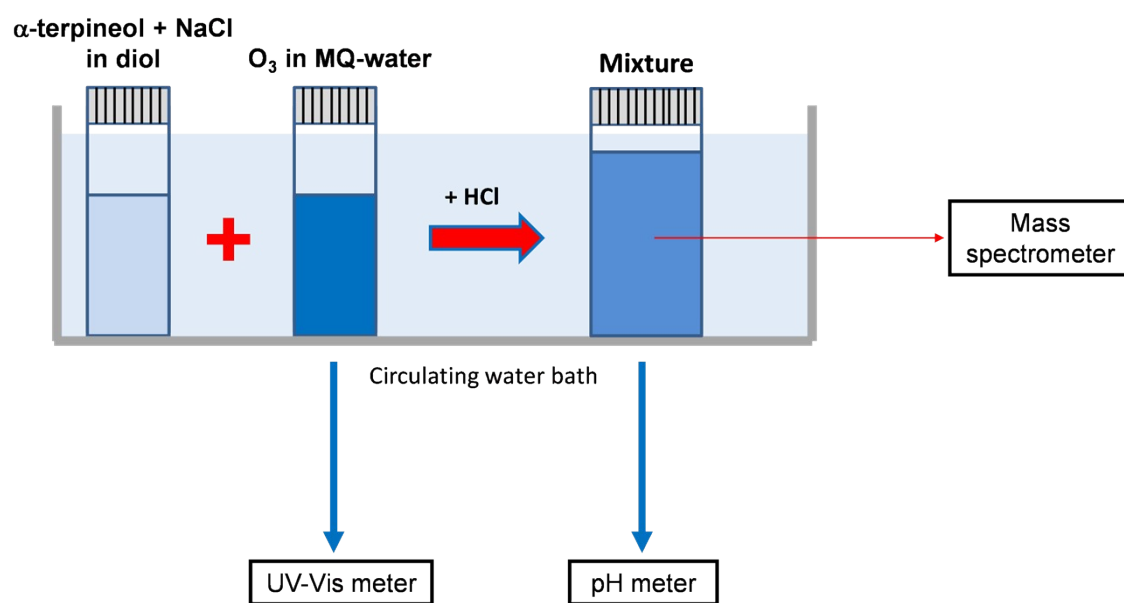

**Figure S1** – Schematic setup of present experiment.

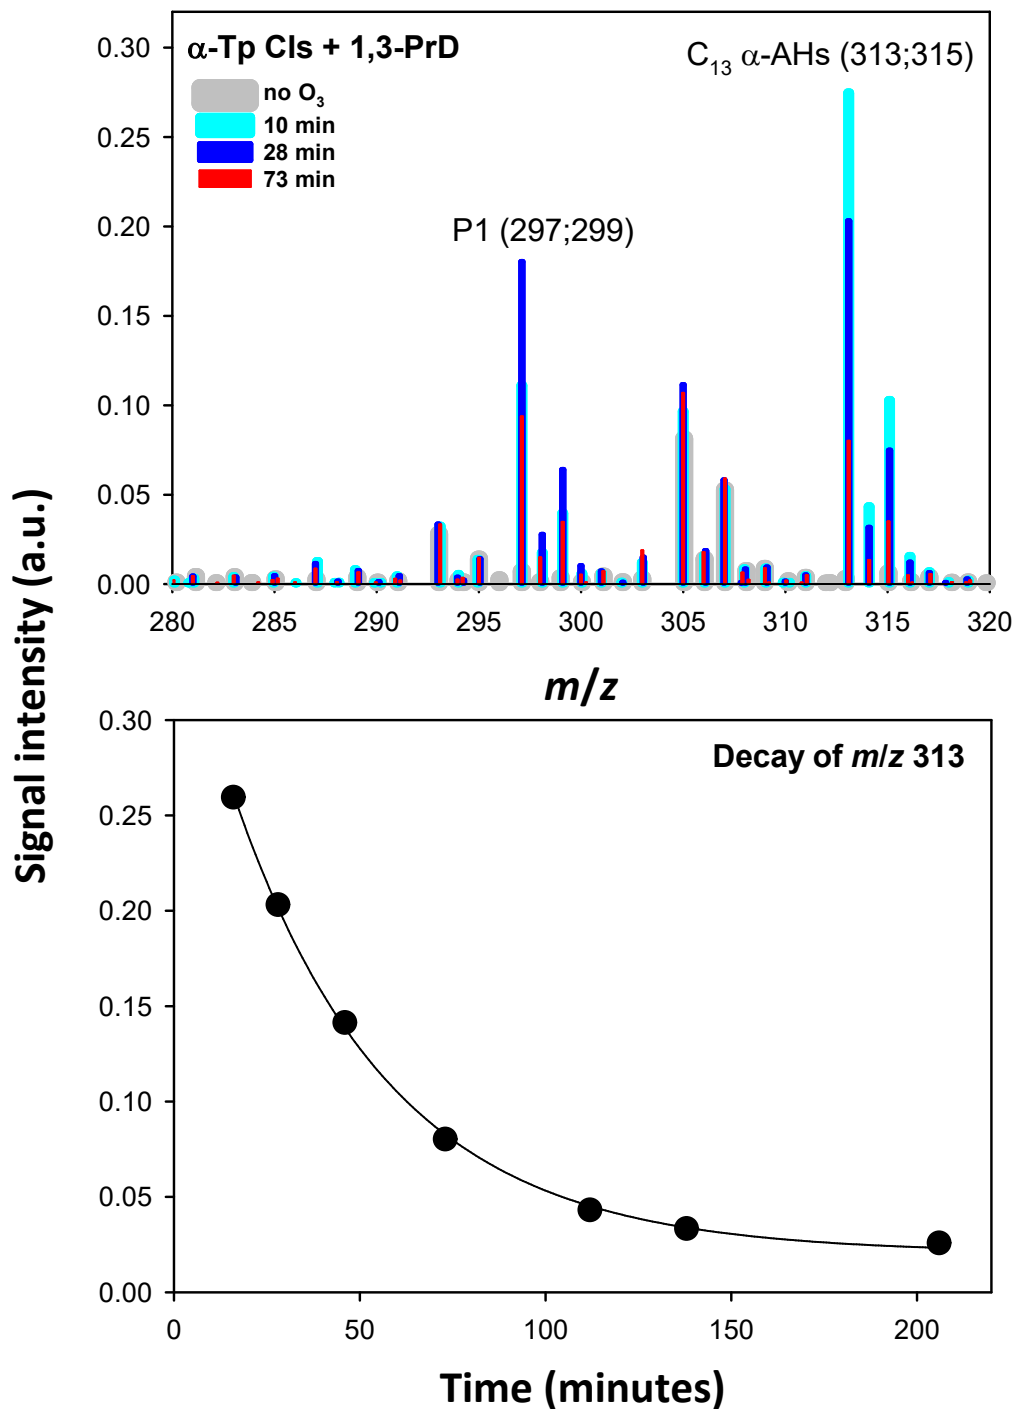

**Fig. S2.** Upper panel) Negative-ion mass spectra of mixtures obtained by ozonolysis ( $[O_3]_0 = 0.06 \pm 0.01$  mM) of  $\alpha$ -terpineol (1 mM)/NaCl (0.2 mM) in 1,3-propanediol:H<sub>2</sub>O (1:1 = vol:vol) solution at pH 5.1 and  $T = 299 \pm 1$  K. Lower panel) The signal intensity at  $m/z$  313 ( $C_{13}$   $\alpha$ -AHs) as a function of time.

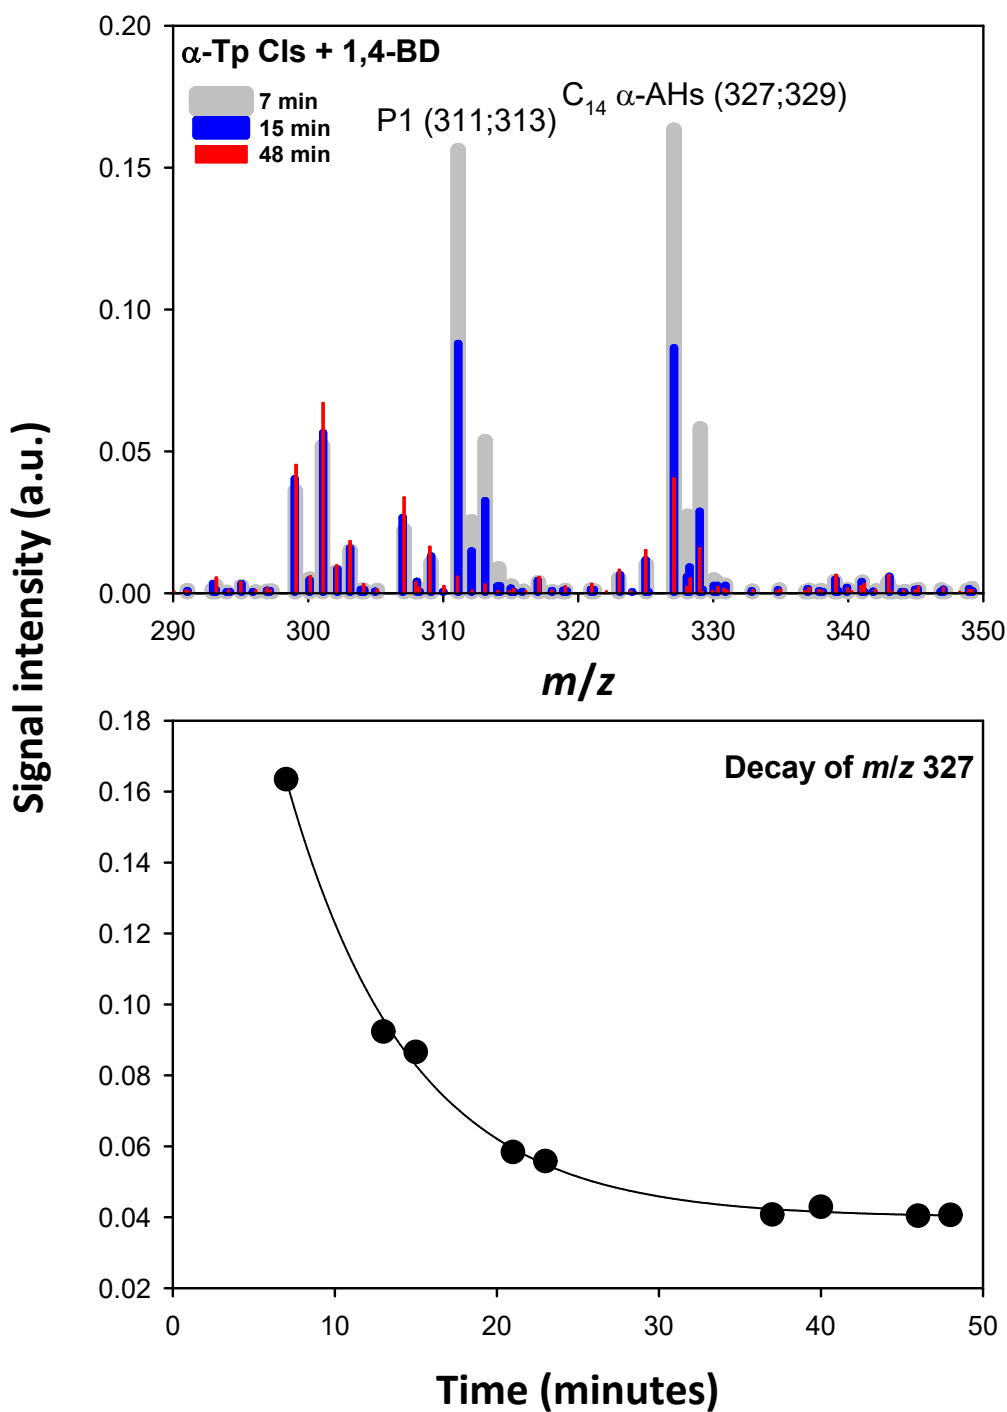

**Fig. S3.** Upper panel) Negative-ion mass spectra of mixtures obtained by ozonolysis ( $[O_3]_0 = 0.06 \pm 0.01$  mM) of  $\alpha$ -terpineol (1 mM)/NaCl (0.2 mM) in 1,4-butanediol:H<sub>2</sub>O (1:1 = vol:vol) solution at pH 4.5 and  $T = 299 \pm 1$  K. Lower panel) The signal intensity at  $m/z$  327 (C<sub>14</sub>  $\alpha$ -AHs) as a function of time.

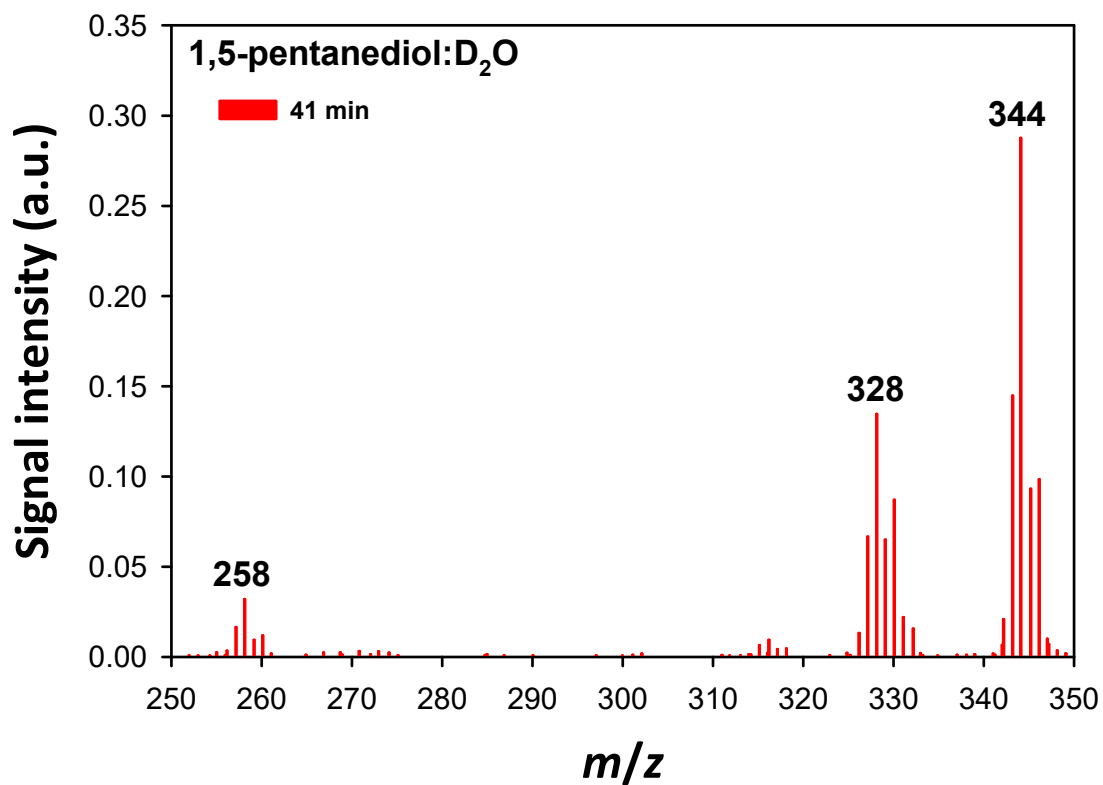

**Fig. S4.** Negative-ion mass spectra of mixtures obtained by ozonolysis ( $[O_3]_0 = 0.06 \pm 0.01$  mM) of  $\alpha$ -terpineol (1 mM)/NaCl (0.2 mM)/HCl (0.05 mM) in 1,5-pentanediol:D<sub>2</sub>O (1:1 = vol:vol) solution at pD = 5.8 at  $T = 299 \pm 1$  K.

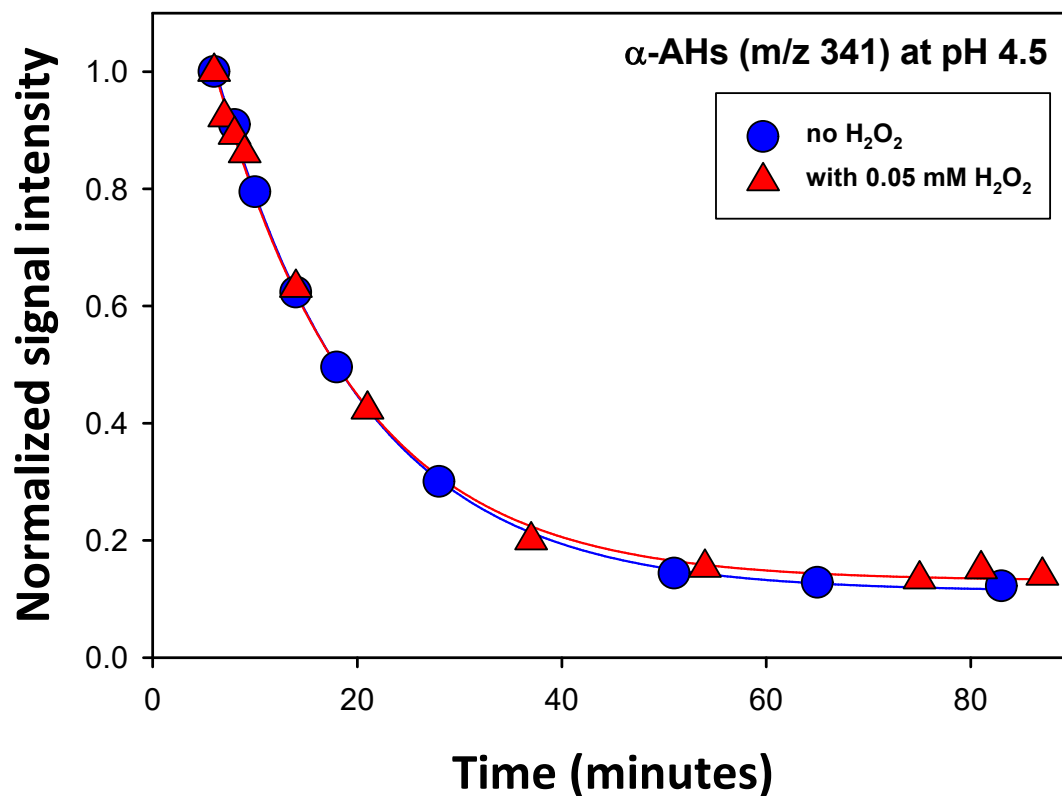

**Fig. S5** Temporal profiles of the Cl<sup>-</sup> adducts of the α-AHs (*m/z* 341) generated by ozonolysis of (1 mM α-terpineol and 0.2 mM NaCl) at [O<sub>3</sub>]<sub>0</sub> = 0.06 ± 0.01 mM in a 1,5-pentandiol:water (1:1 = vol:vol) solution in the absence (blue circles) or presence of 0.05 mM H<sub>2</sub>O<sub>2</sub> (red triangles) at *T* = 299 ± 1 K acidified by 0.05 mM to pH 4.5. Background signals obtained from mass spectra in the absence of O<sub>3</sub> were subtracted. Lines indicate fits of signal intensities (*S*) to single-exponential functions with baselines.

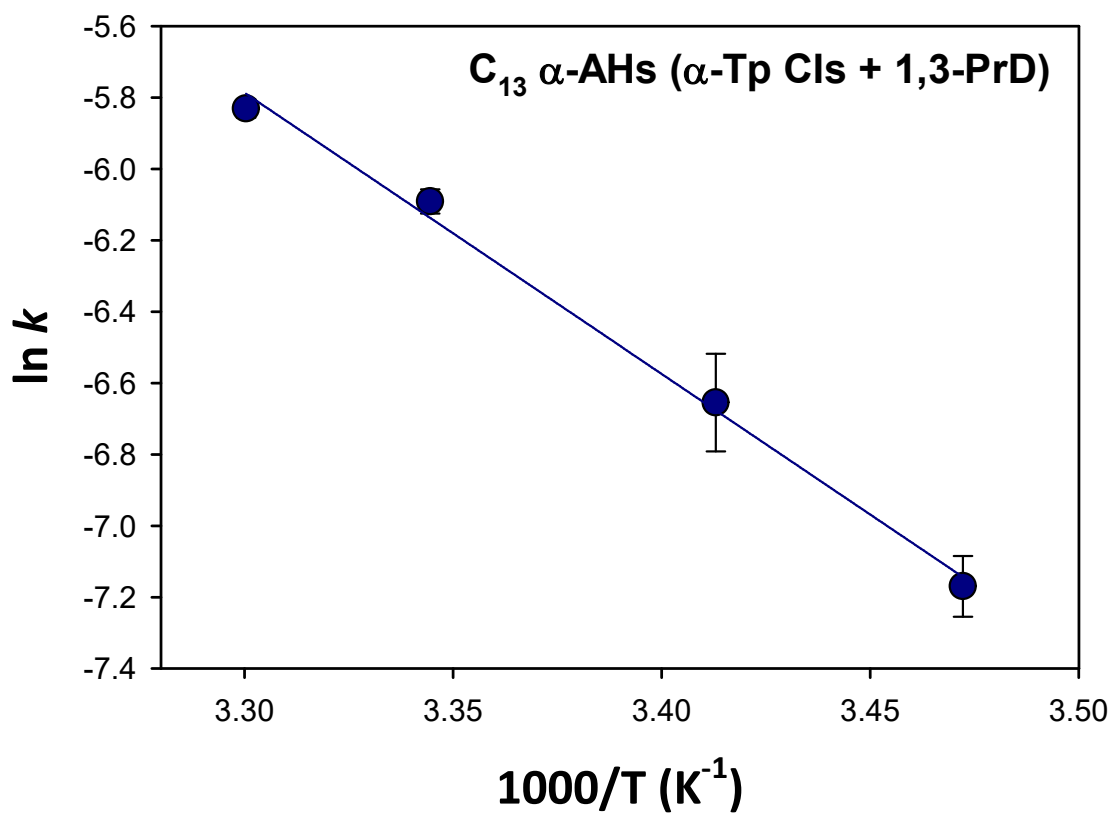

**Fig. S6.** Arrhenius plot of the rate coefficients for decay of the  $\text{C}_{13}$   $\alpha$ -AHs generated by ozonolysis of  $\alpha$ -terpineol/NaCl in 1,3-propanediol:water (1:1) at pH 4.5. Note the error bars (= SDs) are obscured by the symbols in some cases. The linear regression yielded a preexponential factor ( $A$ ) of  $6.0 \times 10^8 \text{ s}^{-1}$  ( $\ln A = 20.2 \pm 1.3$ ) and an  $E_a$  value of  $15.7 \pm 0.8 \text{ kcal mol}^{-1}$ .

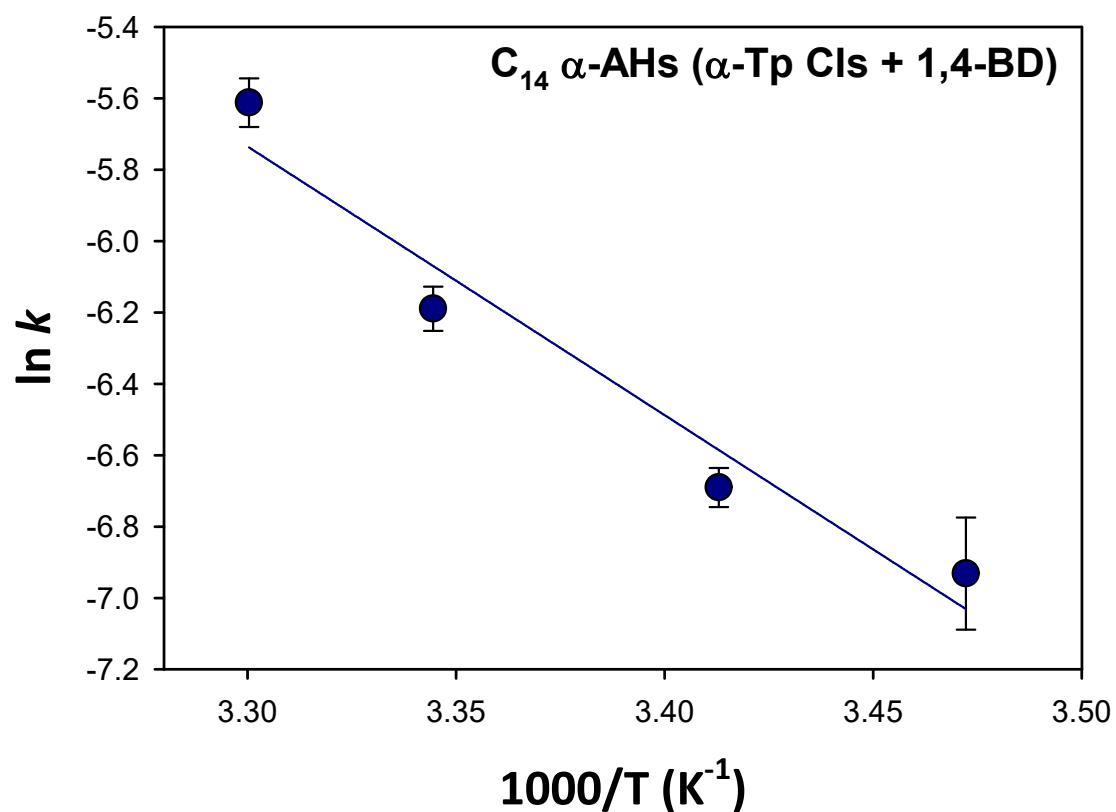

**Fig. S7.** Arrhenius plot of the rate coefficients for decay of the  $\text{C}_{14}$   $\alpha$ -AHs generated by ozonolysis of  $\alpha$ -terpineol/NaCl in 1,4-butanediol:water (1:1) at pH 4.5. The linear regression yielded a preexponential factor ( $A$ ) of  $2.0 \times 10^8 \text{ s}^{-1}$  ( $\ln A = 19.1 \pm 4.1$ ) and an  $E_a$  value of  $15.0 \pm 2.4 \text{ kcal mol}^{-1}$ .
